# Supplementary material
Source: PubMed Central journal article supplement (PMC5917424)
Supplement: sph002182528s1.pdf [file sph002182528s1.pdf]

## 1. Bacterial Cultural Media

### 1.1 Artificial sputum media recipes for *Rothia mucilaginosa* culture

Pig mucin 2%

KCl 0.22mg/mL

NaCl 5mg/mL

Egg Yolk Emulsion 0.25%

Salmon sperm DNA 1.4mg/mL

Ferritin 0.004mg/mL

Essential amino acid mix 0.375x

Non-essential amino acid mix 0.5x

MgSO<sub>4</sub> 1mM

BME vitamin stock 1x

Trace metals stock 1x

U-<sup>13</sup>C<sub>6</sub> glucose 40mM

Essential amino acid mix components:

| Ingredient                       | Stock Concentration g/l<br>(50x) | ASM concentration g/l<br>(0.375x) |
|----------------------------------|----------------------------------|-----------------------------------|
| L-Arginine HCl                   | 6.32                             | 0.0474                            |
| L-Cystine • 2HCl                 | 1.564                            | 0.01173                           |
| L-Histidine•HCl•H <sub>2</sub> O | 2.1                              | 0.01575                           |
| L-Isoleucine                     | 2.625                            | 0.0196875                         |
| L-Leucine                        | 2.62                             | 0.01965                           |
| L-Lysine•HCl                     | 3.625                            | 0.0271875                         |
| L-Methionine                     | 0.755                            | 0.0056625                         |
| L-Phenylalanine                  | 1.65                             | 0.012375                          |
| L-Threonine                      | 2.38                             | 0.01785                           |
| L-Tryptophan                     | 0.51                             | 0.003825                          |
| L-Tyrosine                       | 1.8                              | 0.0135                            |
| L-Valine                         | 2.34                             | 0.01755                           |

Non-essential amino acid mix components:

| Ingredient                    | Stock Concentration g/l<br>(100x) | ASM concentration g/l<br>(0.5 x) |
|-------------------------------|-----------------------------------|----------------------------------|
| L-Alanine (free base)         | 0.89                              | 0.00445                          |
| L-Asparagine•H <sub>2</sub> O | 1.5                               | 0.0075                           |
| L-Aspartic Acid               | 1.33                              | 0.00665                          |
| L-Glutamic Acid               | 1.47                              | 0.00735                          |
| Glycine                       | 0.75                              | 0.00375                          |
| L-Proline                     | 1.15                              | 0.00575                          |
| L-Serine                      | 1.05                              | 0.00525                          |

### 1.2 M9 minimal media recipes for *Pseudomonas aeruginosa* culture

Na<sub>2</sub>HPO<sub>4</sub> 7H<sub>2</sub>O 64g/L

KH<sub>2</sub>PO<sub>4</sub> 15g/L

NaCl 2.5g/L

NH<sub>4</sub>Cl 5g/L

MgSO<sub>4</sub> 1mM

CaCl<sub>2</sub> 0.1mM

Succinate 40mM

## 2. Sample Preparation and Data Acquisition

### 2.1 Bacterial strains

*Pseudomonas aeruginosa* FLR19 and *Rothia mucilaginosa* RmFLR01 were isolated from the sputum of an adult CF patient. The genomes from both of these strains are publicly available on the PATRIC database to anyone with a PATRIC account:

<https://www.patricbrc.org/workspace/tgallagh@patricbrc.org/Genomes/FLR01>

<https://www.patricbrc.org/workspace/tgallagh@patricbrc.org/Genomes/Rm>

### 2.2 Glycolysis, TCA cycle metabolites and amino acids

50 uL of bacterial cells or supernatant were used for extraction. Polar metabolites were extracted with 1mL acetonitrile, isopropanol and water (3:3:2) and dried down in the speed vacuum concentration system, followed by methoximation and tert.butyldimethylsilylation. Agilent

5977A GC-quadrupole mass spectrometer was used for data acquisition in electron ionization mode.

### **2.3 Pentose phosphate pathway metabolites**

50uL bacterial cells or media were used for extraction. Metabolites were extracted with 1mL acetonitrile, isopropanol and water (3:3:2) and dried down in the speed vacuum concentration system, followed by methoximation and trimethylsilylation. Agilent 7200 GC-accurate-mass QTOF was used for data acquisition in methane chemical ionization mode.

### **2.4 Short Chain Fatty Acids**

50uL bacterial cells or media were used for short chain fatty acid analysis. Metabolites were extracted with 700uL of water, hydrochloric acid and methyl tert-butyl ether (5:1:1), followed by dehydration by anhydrous sodium sulfate and tert.butyldimethylsilylation. Agilent 5977A GC-quadrupole mass spectrometer was used for data acquisition in electron ionization mode.

### **2.5 Long Chain Fatty Acids**

50uL bacterial cells or media were used for lipidomics analysis. 225uL methanol, 750uL methyl tert-butyl ether and 188uL water were used as extraction buffers. Samples were dried down in the speed vacuum concentration system and re-suspended with 110uL of methanol and toluene (9:1) with 50ng/mL CUDA (N-cyclohexyl-N'-dodecanoic acid urea). Data was acquired by Agilent 6550 Accurate-Mass QTOF LC/MS with CSH column in negative mode.
