# Supplementary material
Source: PubMed Central journal article supplement (PMC5917424)

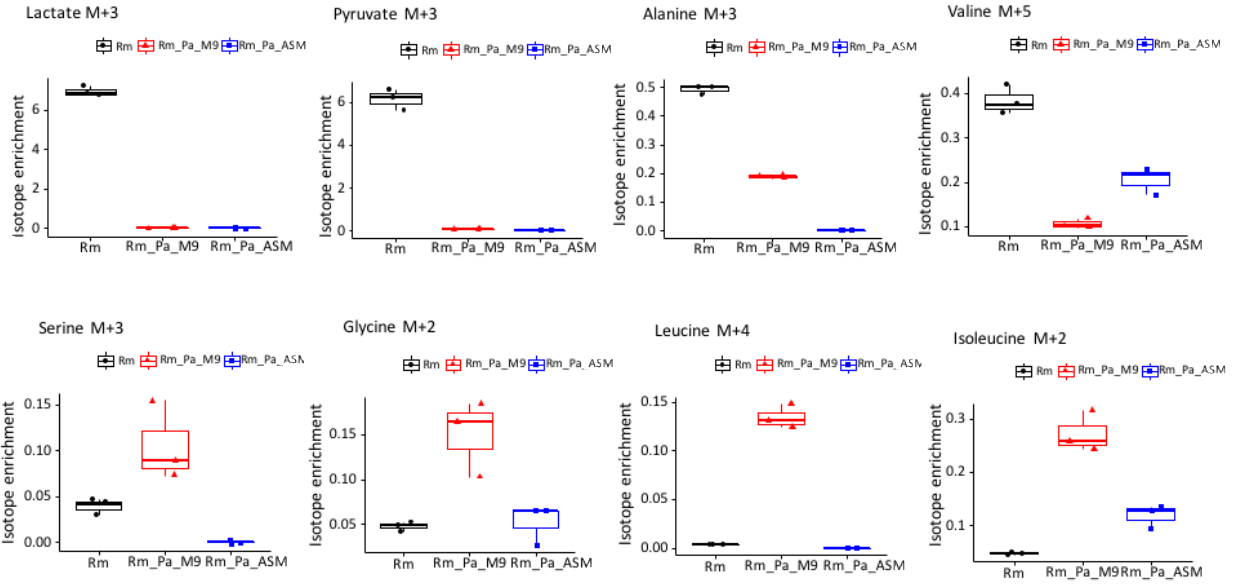

Fig. S1

Supplement: sph002182528sf1.pdf [file sph002182528sf1.pdf]

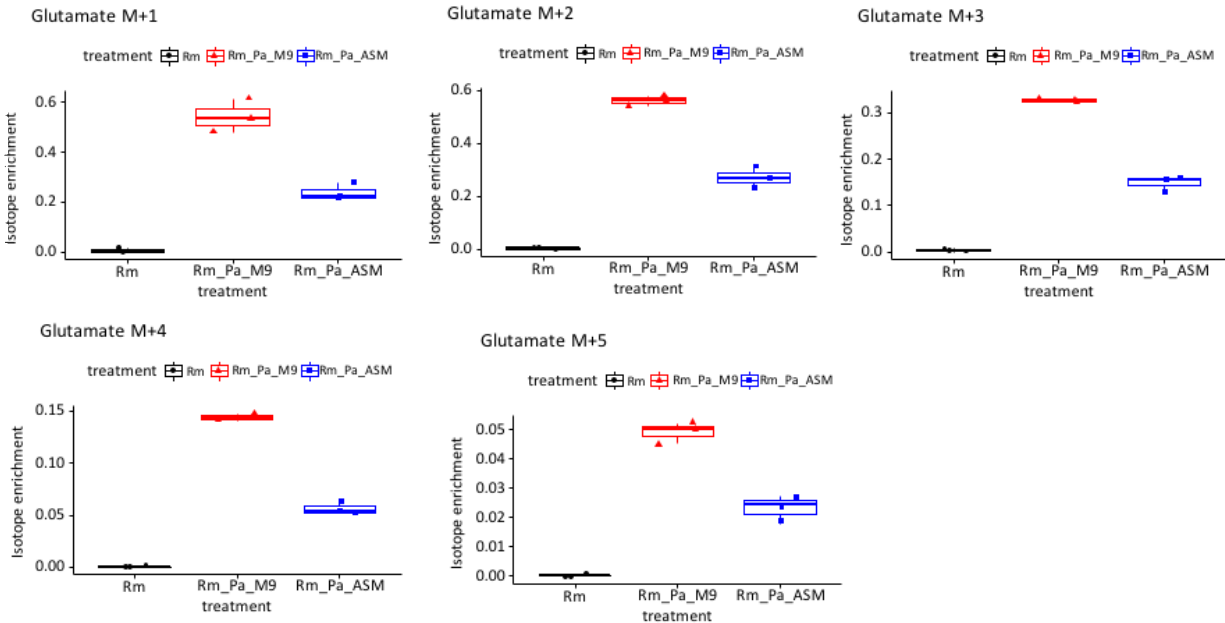

Fig. S2

Supplement: sph002182528sf2.pdf [file sph002182528sf2.pdf]
